# Supplementary material
Source: publisher figshare collection journal article supplement (https://acs.figshare.com/ndownloader/files/5339776)
Supplement: Supplementary file 1 [file 5339776]

data_global
#==============================================================================

_audit_creation_method               'form.cif (version 2.0)'

# PROCESSING SUMMARY (IUCr Office Use Only)

_journal_data_validation_number      ?

_journal_date_recd_electronic        ?
_journal_date_to_coeditor            ?
_journal_date_from_coeditor          ?
_journal_date_accepted               ?
_journal_date_printers_first         ?
_journal_date_printers_final         ?
_journal_date_proofs_out             ?
_journal_date_proofs_in              ?
_journal_coeditor_name               ?
_journal_coeditor_code               ?
_journal_coeditor_notes
; ?
;
_journal_techeditor_code             ?
_journal_techeditor_notes
; ?
;
_journal_coden_ASTM                  ?
_journal_name_full                   ?
_journal_year                        ?
_journal_volume                      ?
_journal_issue                       ?
_journal_page_first                  ?
_journal_page_last                   ?
_journal_paper_category              ?
_journal_suppl_publ_number           ?
_journal_suppl_publ_pages            ?

#==============================================================================

# SUBMISSION DETAILS

_publ_contact_author_name
                'Francisca Sanz Gonzalez'

_publ_contact_author_address
;
Servicio Difraccion Rayos X
Universidad de Salamanca
Plaza de los Caidos 1-5
37008 Salamanca. Spain
;
_publ_contact_author_email  sdrayosx@usal.es
_publ_contact_author_fax '34 23294400'
_publ_contact_author_phone '34 23294574'
_publ_contact_letter
;
;
 
_publ_requested_journal  'Angewandte Chemie'
_publ_requested_category        EO

#==============================================================================

# TITLE AND AUTHOR LIST

_publ_section_title
;
Highly one-pot asymmetric synthesis of gamma-amino
acids throughout domino: Ireland-Claisen rearragement
and Michael addition
;
_publ_section_title_footnote
; ?
;
 
# The loop structure below should contain the names and addresses of all
# authors, in the required order of publication. Repeat as necessary.

loop_
         _publ_author_name
         _publ_author_footnote
         _publ_author_address

                                                               
' Garrido, Narciso M.'        .
;
Departamento Quimica Organica
Facultad de Ciencias Quimicas                               
Universidad de Salamanca                                            
Plaza de los Caidos 1-5
37008 Salamanca                                                            
Spain
;
' Garcia, Mercedes'        .
;
Departamento Quimica Organica
Facultad de Ciencias Quimicas                               
Universidad de Salamanca                                            
Plaza de los Caidos 1-5
37008 Salamanca                                                            
Spain
;
                                                               
' Diez, D.'        .
;
Departamento Quimica Organica
Facultad de Ciencias Quimicas                               
Universidad de Salamanca                                            
Plaza de los Caidos 1-5
37008 Salamanca                                                            
Spain
;
                                                               
' Sanchez, M. Rosa.'        .
;
Departamento Quimica Organica
Facultad de Ciencias Quimicas                               
Universidad de Salamanca                                            
Plaza de los Caidos 1-5
37008 Salamanca                                                            
Spain
;
' Sanz, F.'        .
;
Servicio Difraccion Rayos X
Universidad de Salamanca
Plaza de los Caidos 1-5
37008 Salamanca. Spain
;
' Urones, Julio G.'        .
;
Departamento Quimica Organica
Facultad de Ciencias Quimicas                               
Universidad de Salamanca                                            
Plaza de los Caidos 1-5
37008 Salamanca                                                            
Spain
;

#==============================================================================

# TEXT

_publ_section_synopsis
;
;
_publ_section_abstract
;

;
_publ_section_comment
;

;
_publ_section_acknowledgements
;
;
_publ_section_references
;
;
_publ_section_figure_captions
;
;
_publ_section_exptl_prep
;
;


#==============================================================================
 
data_absofin 
  
_audit_creation_method            SHELXL 
_chemical_name_systematic 
; 
 ? 
; 
_chemical_name_common             ? 
_chemical_formula_moiety          'C13 H15 N O3'  
_chemical_formula_structural      ? 
_chemical_formula_analytical      ? 
_chemical_formula_sum             'C13 H15 N O3' 
_chemical_formula_weight          233.26 
_chemical_melting_point           ? 
_chemical_compound_source         ? 
  
loop_ 
 _atom_type_symbol 
 _atom_type_description 
 _atom_type_scat_dispersion_real 
 _atom_type_scat_dispersion_imag 
 _atom_type_scat_source 
 'C'  'C'   0.0033   0.0016 
 'International Tables Vol C Tables 4.2.6.8 and 6.1.1.4' 
 'H'  'H'   0.0000   0.0000 
 'International Tables Vol C Tables 4.2.6.8 and 6.1.1.4' 
 'N'  'N'   0.0061   0.0033 
 'International Tables Vol C Tables 4.2.6.8 and 6.1.1.4' 
 'O'  'O'   0.0106   0.0060 
 'International Tables Vol C Tables 4.2.6.8 and 6.1.1.4' 
  
_symmetry_cell_setting            Triclinic 
_symmetry_space_group_name_H-M    P1 
  
loop_ 
 _symmetry_equiv_pos_as_xyz 
 'x, y, z' 
  
_cell_length_a                    5.7310(11) 
_cell_length_b                    9.956(2) 
_cell_length_c                    11.765(2) 
_cell_angle_alpha                 106.35(3) 
_cell_angle_beta                  96.43(3) 
_cell_angle_gamma                 100.74(3) 
_cell_volume                      623.1(2) 
_cell_formula_units_Z             2 
_cell_measurement_temperature     293(2) 
_cell_measurement_reflns_used     25
_cell_measurement_theta_min       8
_cell_measurement_theta_max       20 
  
_exptl_crystal_description        prismatic 
_exptl_crystal_colour             colorless 
_exptl_crystal_size_max           0.15
_exptl_crystal_size_mid           0.10
_exptl_crystal_size_min           0.08
_exptl_crystal_density_meas       ? 
_exptl_crystal_density_diffrn     1.243 
_exptl_crystal_density_method     ? 
_exptl_crystal_F_000              248 
_exptl_absorpt_coefficient_mu     0.726 
_exptl_absorpt_correction_type    none 
_exptl_absorpt_correction_T_min   ? 
_exptl_absorpt_correction_T_max   ? 
  
_exptl_special_details 
; 
 ? 
; 
  
_diffrn_ambient_temperature       293(2) 
_diffrn_radiation_wavelength      1.54180 
_diffrn_radiation_type            CuK\a 
_diffrn_radiation_source          'fine-focus sealed tube' 
_diffrn_radiation_monochromator   graphite 
_diffrn_measurement_device        'Seifert 3003SC' 
_diffrn_measurement_method        '2theta-omega' 
_diffrn_standards_number          2 
_diffrn_standards_interval_count  100 
_diffrn_standards_interval_time   ? 
_diffrn_standards_decay_%         'no decay, variation 0.5'  
_diffrn_reflns_number             1832 
_diffrn_reflns_av_R_equivalents   0.0000 
_diffrn_reflns_av_sigmaI/netI     0.0150 
_diffrn_reflns_limit_h_min        0 
_diffrn_reflns_limit_h_max        6 
_diffrn_reflns_limit_k_min        -11 
_diffrn_reflns_limit_k_max        10 
_diffrn_reflns_limit_l_min        -12 
_diffrn_reflns_limit_l_max        12 
_diffrn_reflns_theta_min          4.75 
_diffrn_reflns_theta_max          59.85 
_diffrn_reflns_theta_full         59.85  
_diffrn_measured_fraction_theta_max    1.000 
_diffrn_measured_fraction_theta_full   1.000  
_reflns_number_total              1832 
_reflns_number_observed           1612 
_reflns_observed_criterion        >2sigma(I) 
  
_computing_data_collection        'CRYSOM' 
_computing_cell_refinement        'CRYSOM' 
_computing_data_reduction         'XRAY-80' 
_computing_structure_solution     'SHELXS-86 (Sheldrick, 1990)' 
_computing_structure_refinement   'SHELXL-93 (Sheldrick, 1993)' 
_computing_molecular_graphics     'Siemens SHELXTL' 
_computing_publication_material   'Siemens SHELXTL' 
  
_refine_special_details 
; 
 Refinement on F^2^ for ALL reflections except for 0 with very negative F^2^ 
 or flagged by the user for potential systematic errors.  Weighted R-factors 
 wR and all goodnesses of fit S are based on F^2^, conventional R-factors R 
 are based on F, with F set to zero for negative F^2^. The observed criterion 
 of F^2^ > 2sigma(F^2^) is used only for calculating _R_factor_obs etc. and is 
 not relevant to the choice of reflections for refinement.  R-factors based 
 on F^2^ are statistically about twice as large as those based on F, and R- 
 factors based on ALL data will be even larger. 
; 
  
_refine_ls_structure_factor_coef  Fsqd 
_refine_ls_matrix_type            full 
_refine_ls_weighting_scheme 
 'calc w=1/[\s^2^(Fo^2^)+(0.1035P)^2^+0.0000P] where P=(Fo^2^+2Fc^2^)/3' 
_atom_sites_solution_primary      direct 
_atom_sites_solution_secondary    difmap 
_atom_sites_solution_hydrogens    geom 
_refine_ls_hydrogen_treatment     mixed
_refine_ls_extinction_method      SHELXL 
_refine_ls_extinction_coef        0.0957(164) 
_refine_ls_extinction_expression 
 'Fc^*^=kFc[1+0.001xFc^2^\l^3^/sin(2\q)]^-1/4^' 
_refine_ls_abs_structure_details 
 'Flack H D (1983), Acta Cryst. A39, 876-881' 
_refine_ls_abs_structure_Flack    0.29(190) 
_refine_ls_number_reflns          1832 
_refine_ls_number_parameters      366 
_refine_ls_number_restraints      3 
_refine_ls_R_factor_all           0.0483 
_refine_ls_R_factor_obs           0.0441 
_refine_ls_wR_factor_all          0.1256 
_refine_ls_wR_factor_obs          0.1213 
_refine_ls_goodness_of_fit_all    1.027 
_refine_ls_goodness_of_fit_obs    1.074 
_refine_ls_restrained_S_all       1.026 
_refine_ls_restrained_S_obs       1.073 
_refine_ls_shift/esd_max          0.012 
_refine_ls_shift/esd_mean         0.000 
_chemical_absolute_configuration  rm 
  
loop_ 
 _atom_site_label 
 _atom_site_type_symbol 
 _atom_site_fract_x 
 _atom_site_fract_y 
 _atom_site_fract_z 
 _atom_site_U_iso_or_equiv 
 _atom_site_thermal_displace_type 
 _atom_site_occupancy 
 _atom_site_calc_flag 
 _atom_site_refinement_flags 
 _atom_site_disorder_group 
N1 N 0.1572(6) 0.4933(3) 0.2209(3) 0.0484(8) Uani 1 d . . 
O1 O -0.5362(6) 0.3823(5) -0.0117(4) 0.1071(15) Uani 1 d . . 
O2 O -0.3564(7) 0.2532(5) -0.1417(4) 0.0972(14) Uani 1 d . . 
O3 O 0.4963(5) 0.6674(3) 0.2671(3) 0.0675(9) Uani 1 d . . 
C1 C -0.5928(14) 0.1800(9) -0.2160(8) 0.132(3) Uani 1 d . . 
H1A H -0.5732 0.1104 -0.2874 0.198 Uiso 1 calc R . 
H1B H -0.6697 0.2491 -0.2377 0.198 Uiso 1 calc R . 
H1C H -0.6908 0.1322 -0.1714 0.198 Uiso 1 calc R . 
C2 C -0.3554(7) 0.3547(5) -0.0421(4) 0.0557(10) Uani 1 d . . 
C3 C -0.1055(6) 0.4264(4) 0.0271(4) 0.0483(9) Uani 1 d . . 
C4 C -0.0516(8) 0.5874(5) 0.0396(5) 0.0635(11) Uani 1 d . . 
C5 C 0.2088(9) 0.6560(6) 0.1005(6) 0.0704(13) Uani 1 d . . 
C6 C 0.2975(7) 0.6056(4) 0.2032(4) 0.0552(10) Uani 1 d . . 
C7 C -0.0844(6) 0.4131(4) 0.1545(4) 0.0448(8) Uani 1 d . . 
C8 C -0.1217(6) 0.2593(4) 0.1566(3) 0.0454(9) Uani 1 d . . 
C9 C -0.3101(8) 0.2040(5) 0.2065(4) 0.0643(12) Uani 1 d . . 
C10 C -0.3433(10) 0.0647(6) 0.2120(5) 0.081(2) Uani 1 d . . 
H10 H -0.4691 0.0296 0.2470 0.097 Uiso 1 calc R . 
C11 C -0.1941(10) -0.0228(6) 0.1667(5) 0.080(2) Uani 1 d . . 
C12 C -0.0131(10) 0.0312(5) 0.1152(6) 0.0778(14) Uani 1 d . . 
C13 C 0.0250(8) 0.1710(5) 0.1099(5) 0.0623(11) Uani 1 d . . 
N2 N 0.6758(6) 0.6027(3) 0.4789(3) 0.0502(8) Uani 1 d . . 
O4 O 1.4053(7) 0.7535(6) 0.7561(4) 0.114(2) Uani 1 d . . 
O5 O 1.0890(10) 0.7922(10) 0.8290(5) 0.183(4) Uani 1 d . . 
O6 O 0.3848(6) 0.4000(3) 0.4124(3) 0.0798(10) Uani 1 d . . 
C14 C 1.5476(12) 0.8407(10) 0.8707(6) 0.125(3) Uani 1 d . . 
H14A H 1.4622 0.9093 0.9107 0.187 Uiso 1 calc R . 
H14B H 1.6986 0.8907 0.8587 0.187 Uiso 1 calc R . 
H14C H 1.5771 0.7805 0.9191 0.187 Uiso 1 calc R . 
C15 C 1.1797(9) 0.7339(7) 0.7464(5) 0.0782(15) Uani 1 d . . 
C16 C 1.0377(9) 0.6339(5) 0.6270(5) 0.0692(13) Uani 1 d . . 
C17 C 0.8995(18) 0.4940(9) 0.6426(12) 0.196(7) Uani 1 d . . 
H17A H 1.0003 0.4252 0.6252 0.235 Uiso 1 calc R . 
H17B H 0.8884 0.5144 0.7272 0.235 Uiso 1 calc R . 
C18 C 0.6841(13) 0.4288(8) 0.5821(8) 0.123(3) Uani 1 d . . 
H18A H 0.5769 0.4305 0.6405 0.147 Uiso 1 calc R . 
H18B H 0.6875 0.3288 0.5463 0.147 Uiso 1 calc R . 
C19 C 0.5653(8) 0.4758(4) 0.4845(4) 0.0595(11) Uani 1 d . . 
C20 C 0.8561(7) 0.7086(4) 0.5789(4) 0.0500(9) Uani 1 d . . 
C21 C 0.9654(7) 0.8322(4) 0.5389(3) 0.0492(9) Uani 1 d . . 
C22 C 1.1467(11) 0.8282(6) 0.4717(5) 0.0837(15) Uani 1 d . . 
H22 H 1.2086 0.7464 0.4515 0.100 Uiso 1 calc R . 
C23 C 1.2384(14) 0.9422(9) 0.4338(6) 0.111(2) Uani 1 d . . 
H23 H 1.3634 0.9381 0.3898 0.134 Uiso 1 calc R . 
C24 C 1.1448(17) 1.0625(8) 0.4611(7) 0.118(3) Uani 1 d . . 
H24 H 1.2038 1.1396 0.4345 0.142 Uiso 1 calc R . 
C25 C 0.9693(17) 1.0677(7) 0.5260(9) 0.124(3) Uani 1 d . . 
H25 H 0.9049 1.1488 0.5433 0.148 Uiso 1 calc R . 
C26 C 0.8789(10) 0.9542(6) 0.5687(7) 0.091(2) Uani 1 d . . 
H26 H 0.7611 0.9618 0.6170 0.109 Uiso 1 calc R . 
H1N H 0.2148(90) 0.4684(49) 0.2761(46) 0.058(13) Uiso 1 d . . 
H2N H 0.5896(109) 0.6271(61) 0.4069(59) 0.094(17) Uiso 1 d . . 
H3 H -0.0059(88) 0.3870(48) -0.0152(43) 0.059(13) Uiso 1 d . . 
H4A H -0.0739(89) 0.5922(52) -0.0477(51) 0.073(13) Uiso 1 d . . 
H4B H -0.1893(121) 0.6246(64) 0.0986(60) 0.102(18) Uiso 1 d . . 
H5A H 0.2598(106) 0.7686(68) 0.1269(53) 0.088(16) Uiso 1 d . . 
H5B H 0.3069(96) 0.6423(50) 0.0484(47) 0.061(14) Uiso 1 d . . 
H7 H -0.2198(88) 0.4520(48) 0.1898(43) 0.064(12) Uiso 1 d . . 
H9 H -0.4032(120) 0.2708(69) 0.2336(57) 0.099(20) Uiso 1 d . . 
H11 H -0.2439(129) -0.1303(75) 0.1610(63) 0.113(20) Uiso 1 d . . 
H12 H 0.1086(133) -0.0370(76) 0.0692(63) 0.117(21) Uiso 1 d . . 
H13 H 0.1368(98) 0.1939(55) 0.0657(49) 0.075(15) Uiso 1 d . . 
H16 H 1.1261(85) 0.6056(49) 0.5759(43) 0.053(13) Uiso 1 d . . 
H20 H 0.7596(81) 0.7368(47) 0.6467(44) 0.057(11) Uiso 1 d . . 
  
loop_ 
 _atom_site_aniso_label 
 _atom_site_aniso_U_11 
 _atom_site_aniso_U_22 
 _atom_site_aniso_U_33 
 _atom_site_aniso_U_23 
 _atom_site_aniso_U_13 
 _atom_site_aniso_U_12 
N1 0.044(2) 0.045(2) 0.050(2) 0.0174(14) -0.0059(15) -0.0014(13) 
O1 0.041(2) 0.137(4) 0.109(3) -0.009(3) 0.000(2) 0.018(2) 
O2 0.062(2) 0.113(3) 0.077(2) -0.017(2) -0.014(2) 0.009(2) 
O3 0.055(2) 0.063(2) 0.070(2) 0.0264(15) -0.0157(15) -0.0152(14) 
C1 0.092(5) 0.136(6) 0.109(5) -0.019(5) -0.032(4) 0.001(4) 
C2 0.046(2) 0.064(3) 0.053(2) 0.019(2) -0.001(2) 0.010(2) 
C3 0.037(2) 0.058(2) 0.052(2) 0.022(2) 0.006(2) 0.009(2) 
C4 0.056(2) 0.062(3) 0.070(3) 0.032(2) -0.010(2) 0.003(2) 
C5 0.056(3) 0.066(3) 0.087(4) 0.042(3) -0.008(3) -0.006(2) 
C6 0.049(2) 0.049(2) 0.064(2) 0.020(2) 0.003(2) 0.002(2) 
C7 0.032(2) 0.048(2) 0.053(2) 0.015(2) 0.0041(15) 0.0072(15) 
C8 0.036(2) 0.047(2) 0.049(2) 0.016(2) 0.002(2) 0.001(2) 
C9 0.055(2) 0.074(3) 0.060(3) 0.024(2) 0.011(2) 0.001(2) 
C10 0.076(3) 0.076(3) 0.082(3) 0.042(3) 0.002(3) -0.024(3) 
C11 0.085(4) 0.054(3) 0.085(3) 0.029(2) -0.022(3) -0.009(3) 
C12 0.072(3) 0.056(3) 0.100(4) 0.025(2) -0.008(3) 0.014(2) 
C13 0.052(2) 0.052(2) 0.084(3) 0.025(2) 0.013(2) 0.009(2) 
N2 0.045(2) 0.045(2) 0.052(2) 0.0153(14) -0.0059(14) -0.0014(14) 
O4 0.055(2) 0.182(5) 0.069(2) 0.000(2) -0.004(2) 0.009(2) 
O5 0.078(3) 0.341(10) 0.069(3) -0.011(4) -0.003(2) 0.029(4) 
O6 0.074(2) 0.054(2) 0.094(2) 0.027(2) -0.021(2) -0.013(2) 
C14 0.069(4) 0.189(8) 0.074(4) 0.004(4) -0.015(3) 0.001(4) 
C15 0.055(3) 0.125(4) 0.056(3) 0.044(3) 0.004(2) 0.005(3) 
C16 0.065(3) 0.068(3) 0.070(3) 0.029(2) -0.014(3) 0.008(2) 
C17 0.142(7) 0.135(7) 0.289(14) 0.158(9) -0.132(9) -0.066(6) 
C18 0.099(4) 0.106(5) 0.165(6) 0.099(5) -0.045(4) -0.020(4) 
C19 0.054(2) 0.050(2) 0.070(3) 0.024(2) -0.005(2) 0.000(2) 
C20 0.045(2) 0.048(2) 0.048(2) 0.009(2) -0.001(2) 0.003(2) 
C21 0.043(2) 0.048(2) 0.046(2) 0.013(2) -0.007(2) -0.001(2) 
C22 0.094(4) 0.082(3) 0.073(3) 0.028(3) 0.025(3) 0.003(3) 
C23 0.122(6) 0.111(5) 0.087(4) 0.051(4) 0.009(4) -0.032(4) 
C24 0.130(6) 0.085(5) 0.107(5) 0.062(4) -0.061(5) -0.055(4) 
C25 0.125(6) 0.062(4) 0.180(8) 0.058(5) -0.021(6) 0.010(4) 
C26 0.073(3) 0.059(3) 0.144(6) 0.039(3) 0.005(3) 0.020(2) 
  
_geom_special_details 
; 
 All esds (except the esd in the dihedral angle between two l.s. planes) 
 are estimated using the full covariance matrix.  The cell esds are taken 
 into account individually in the estimation of esds in distances, angles 
 and torsion angles; correlations between esds in cell parameters are only 
 used when they are defined by crystal symmetry.  An approximate (isotropic) 
 treatment of cell esds is used for estimating esds involving l.s. planes. 
; 
  
loop_ 
 _geom_bond_atom_site_label_1 
 _geom_bond_atom_site_label_2 
 _geom_bond_distance 
 _geom_bond_site_symmetry_2 
 _geom_bond_publ_flag 
N1 C6 1.331(5) . ? 
N1 C7 1.470(5) . ? 
O1 C2 1.188(5) . ? 
O2 C2 1.312(6) . ? 
O2 C1 1.463(7) . ? 
O3 C6 1.237(5) . ? 
C2 C3 1.502(5) . ? 
C3 C7 1.535(5) . ? 
C3 C4 1.536(6) . ? 
C4 C5 1.520(6) . ? 
C5 C6 1.506(7) . ? 
C7 C8 1.513(5) . ? 
C8 C13 1.375(6) . ? 
C8 C9 1.384(6) . ? 
C9 C10 1.386(7) . ? 
C10 C11 1.376(9) . ? 
C11 C12 1.359(9) . ? 
C12 C13 1.388(7) . ? 
N2 C19 1.326(5) . ? 
N2 C20 1.479(5) . ? 
O4 C15 1.258(6) . ? 
O4 C14 1.438(7) . ? 
O5 C15 1.207(8) . ? 
O6 C19 1.229(5) . ? 
C15 C16 1.511(7) . ? 
C16 C20 1.533(6) . ? 
C16 C17 1.537(8) . ? 
C17 C18 1.302(9) . ? 
C18 C19 1.499(7) . ? 
C20 C21 1.495(6) . ? 
C21 C26 1.367(7) . ? 
C21 C22 1.373(7) . ? 
C22 C23 1.370(9) . ? 
C23 C24 1.373(13) . ? 
C24 C25 1.329(13) . ? 
C25 C26 1.399(10) . ? 
  
loop_ 
 _geom_angle_atom_site_label_1 
 _geom_angle_atom_site_label_2 
 _geom_angle_atom_site_label_3 
 _geom_angle 
 _geom_angle_site_symmetry_1 
 _geom_angle_site_symmetry_3 
 _geom_angle_publ_flag 
C6 N1 C7 127.8(4) . . ? 
C2 O2 C1 116.1(5) . . ? 
O1 C2 O2 122.1(4) . . ? 
O1 C2 C3 125.3(4) . . ? 
O2 C2 C3 112.6(4) . . ? 
C2 C3 C7 110.2(3) . . ? 
C2 C3 C4 110.0(3) . . ? 
C7 C3 C4 107.5(3) . . ? 
C5 C4 C3 109.4(4) . . ? 
C6 C5 C4 115.4(4) . . ? 
O3 C6 N1 122.1(4) . . ? 
O3 C6 C5 119.9(3) . . ? 
N1 C6 C5 118.0(4) . . ? 
N1 C7 C8 109.1(3) . . ? 
N1 C7 C3 108.0(3) . . ? 
C8 C7 C3 113.5(3) . . ? 
C13 C8 C9 118.2(4) . . ? 
C13 C8 C7 122.3(3) . . ? 
C9 C8 C7 119.5(4) . . ? 
C8 C9 C10 120.3(5) . . ? 
C11 C10 C9 121.3(5) . . ? 
C12 C11 C10 118.0(5) . . ? 
C11 C12 C13 121.6(6) . . ? 
C8 C13 C12 120.5(5) . . ? 
C19 N2 C20 123.0(4) . . ? 
C15 O4 C14 117.4(5) . . ? 
O5 C15 O4 120.7(5) . . ? 
O5 C15 C16 124.0(5) . . ? 
O4 C15 C16 115.4(5) . . ? 
C15 C16 C20 108.6(4) . . ? 
C15 C16 C17 110.4(6) . . ? 
C20 C16 C17 108.9(5) . . ? 
C18 C17 C16 121.7(5) . . ? 
C17 C18 C19 122.5(5) . . ? 
O6 C19 N2 122.7(4) . . ? 
O6 C19 C18 122.5(4) . . ? 
N2 C19 C18 114.8(4) . . ? 
N2 C20 C21 109.4(3) . . ? 
N2 C20 C16 109.9(3) . . ? 
C21 C20 C16 114.8(4) . . ? 
C26 C21 C22 118.3(5) . . ? 
C26 C21 C20 118.6(4) . . ? 
C22 C21 C20 123.1(4) . . ? 
C23 C22 C21 121.5(7) . . ? 
C22 C23 C24 119.6(7) . . ? 
C25 C24 C23 119.5(6) . . ? 
C24 C25 C26 121.6(7) . . ? 
C21 C26 C25 119.4(7) . . ? 
  
_refine_diff_density_max    0.199 
_refine_diff_density_min   -0.161 
_refine_diff_density_rms    0.034 
